# Supplementary material for: TRPV1 modulated NLRP3 inflammasome activation via calcium in experimental subarachnoid hemorrhage
Source: publisher site journal article supplement (doi:10.18632/aging.205379), 2024-01-04
Supplement: Supplementary file [file aging-v16i2-205379-supplementary-material-SD1.pdf]

## SUPPLEMENTARY TABLE

Supplementary Table 1. Sequence of primers for qPCR.

| Gene    |   | Primer sequence                 |
|---------|---|---------------------------------|
| β-actin | F | 5'-AGGCATTGTGATGGACTCCG-3'      |
|         | R | 5'-AGCTCAGTAACAGTCCGCCTA-3'     |
| TRPV1   | F | 5'-CGAGGATGGGAAGAATAACTCACTG-3' |
|         | R | 5'-GGATGATGAAGACAGCCTTGAAGTC-3' |
| IL-1β   | F | 5'-GCCACCTTTTGACAGTGATGAG-3'    |
|         | R | 5'-GGAGCCTGTAGTGCAGTTGT-3'      |
| CD86    | F | 5'-TTACGGAAGCACCCACGATG-3'      |
|         | R | 5'-TGTCAGCGTACTATCCCGC-3'       |
| CD16    | F | 5'-ACTGTGGTTGGCTTTTGGGAT-3'     |
|         | R | 5'-GAGTGATTTCTGACTGGCTGCTG-3'   |
| CD32    | F | 5'-CCAGAAAGGCCAGGATCTAGTG-3'    |
|         | R | 5'-GGGAACCAATCTCGTAGTGTCTGT-3'  |
| TNFα    | F | 5'-ATCGGTCCCAACAAGGAGGA-3'      |
|         | R | 5'-CGCTTGGTGGTTTGCTACG-3'       |
